# Supplementary material for: Assembling tetrazole-rings on a fused ring framework: toward energetic materials with enhanced performance
Source: Royal Society of Chemistry journal article supplement (doi:10.1039/d3qo00659j), 2023-01-01
Supplement: d3qo00659j1.pdf [file d3qo00659j1.pdf]

# Assembling tetrazole-rings on a fused ring framework: toward energetic materials with enhanced performance

Shangbiao Feng,<sup>ab</sup> Boqian Yang,<sup>a</sup> Baoseng Zhang,<sup>a</sup> Chuanhao Xu,<sup>a</sup> Yang Liu,<sup>\* a</sup> Shuangfei Zhu,<sup>a</sup> Ruijun Gou,<sup>a</sup> Shuhai Zhang,<sup>\* a</sup> Ping Yin,<sup>\* bc</sup>

<sup>a</sup> School of Environmental and Safety Engineering, North University of China, Taiyuan 030051, PR China

<sup>b</sup> School of Materials Science & Engineering, Beijing Institute of Technology, Beijing 100081, China

<sup>c</sup> Beijing Institute of Technology Chongqing Innovation Center, Chongqing 401120, China

## Supporting Information

### Table of Contents

|                                                                    |    |
|--------------------------------------------------------------------|----|
| 1. Experimental Section .....                                      | 2  |
| 2. X-ray Crystallography .....                                     | 4  |
| 3. Calculations of the heats of formation. ....                    | 6  |
| 4. DFT Calculations of Mechanism for DR reaction. ....             | 7  |
| 5. The electrostatic potentials (ESP) analysis of 1, 2 and 3. .... | 8  |
| 6. DSC Plot of All Products. ....                                  | 11 |
| 7. NMR Spectra of All Products .....                               | 12 |

# 1. Experimental Section

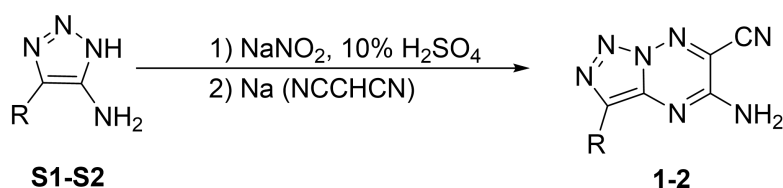

## General procedure 1 for synthesis 1-2:

To an ice-cold suspension of **S1-S2**<sup>[1]</sup> (1.0 mmol) in 10.0 mL 10% H<sub>2</sub>SO<sub>4</sub>, sodium nitrite (103.5 mg, 1.5 mmol) in distilled water (5.0 mL) was added dropwise. The mixture was warmed up to ~20 °C and stirred 0.5-1 h at this temperature. A mixture of malononitrile (198.0 mg, 3.0 mmol) in distilled water (2.0 mL) was added dropwise into the as-prepared solution of diazonium salt at 0-5 °C. The final reaction was stirred at room temperature for 3 days. The final mixture was filtered, washed by water and dried in vacuum to give **1-2**.

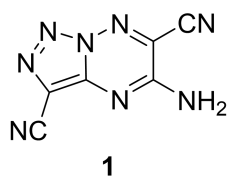

Compound 5-amino-[1,2,3]triazolo[1,5-b][1,2,4]triazine-3,6-dicarbonitrile **1** was obtained as a merdoie solid in 81% yield according to the general procedure 1. <sup>1</sup>H NMR (400 MHz, [D<sub>6</sub>]DMSO) δ 9.40 (s, 1H), 8.88 (s, 1H). <sup>13</sup>C NMR (101 MHz, [D<sub>6</sub>]DMSO) δ 152.8, 142.3, 123.6, 112.3, 112.1, 104.7. IR (KBr pellet): ν 3389, 3320, 3194, 2247, 2223, 2207, 1651, 1599, 1541, 1456, 1345, 1320, 1301, 1240, 1223, 1130, 1042, 978, 880, 857, 839, 766, 737, 704, 672, 653, 553, 521, 495, 484, 456, 437 cm<sup>-1</sup>. Elemental analysis (%) calcd for C<sub>6</sub>H<sub>2</sub>N<sub>8</sub> (186.14): C, 38.72; H, 1.08; N, 60.20; found: C, 38.62; H, 1.12; N, 59.88.

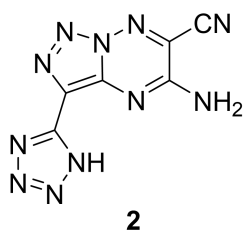

Compound 5-amino-3-(1H-tetrazol-5-yl)-[1,2,3]triazolo[1,5-b][1,2,4]triazine-6-carbonitrile **2** was obtained as a merdoie solid in 82% yield according to the general procedure 1. <sup>1</sup>H NMR (400 MHz, [D<sub>6</sub>]DMSO) δ 9.12 (s, 1H), 8.55 (s, 1H). <sup>13</sup>C NMR (101 MHz, [D<sub>6</sub>]DMSO) δ 151.9, 148.3, 136.8, 122.8, 117.8, 112.4. IR (KBr pellet): ν 3445, 3353, 3271, 3204, 2359, 2341, 2223, 1648, 1601, 1522, 1484, 1456, 1406, 1316, 1303, 1277, 1226, 1122, 1059, 865, 797, 766, 755, 714, 670, 646, 599, 528 cm<sup>-1</sup>. Elemental analysis (%) calcd for C<sub>6</sub>H<sub>3</sub>N<sub>11</sub> (229.17): C, 31.45; H, 1.32; N, 67.23; found: C, 31.31; H, 1.38; N, 67.01.

### Synthetic procedure of **3**

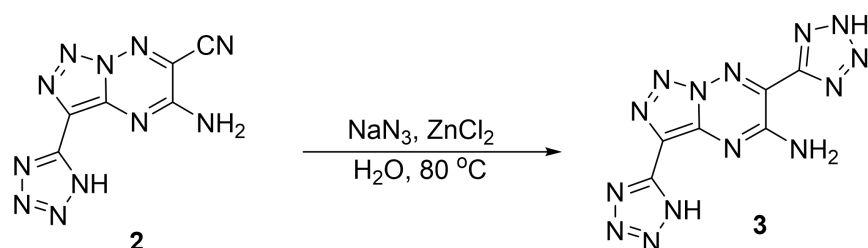

To a solution of **2** (1.0 mmol, 206.0 mg) in 5 mL H<sub>2</sub>O was added NaN<sub>3</sub> (1.5 mmol, 98.0 mg) and ZnCl<sub>2</sub> (1.2 mmol, 163.0 mg). The reaction mixture was heated to 80 °C and refluxed overnight. Then the resulting mixture was cooled to room temperature and acidified to pH 1-2 with 20% HCl. The precipitate formed was collected and dried in vacuum, giving **3** as a orange solid (45% yield). **<sup>1</sup>H NMR** (400 MHz, [D<sub>6</sub>]DMSO)  $\delta$  9.25 (s, 1H), 8.59 (s, 1H). **<sup>13</sup>C NMR** (101 MHz, [D<sub>6</sub>]DMSO)  $\delta$  152.1, 151.1, 148.5, 136.5, 130.8, 117.7. **IR (KBr pellet)**:  $\nu$  3374, 3272, 2647, 1606, 1569, 1485, 1444, 1326, 1289, 1261, 1174, 1133, 1078, 1000, 978, 805, 783, 754, 728, 697, 667, 617, 514, 456, 407 cm<sup>-1</sup>. **Elemental analysis (%)** calcd for C<sub>6</sub>H<sub>4</sub>N<sub>14</sub> (272.2): C, 26.48; H, 1.48; N, 72.04; found: C, 26.68; H, 1.53; N, 71.83.

## 2. X-ray Crystallography

|                                             |                                                               |
|---------------------------------------------|---------------------------------------------------------------|
| compound                                    | <b>1</b> · CH <sub>3</sub> CN                                 |
| CCDC number                                 | 2246333                                                       |
| Empirical formula                           | C <sub>9</sub> H <sub>5</sub> N <sub>8</sub>                  |
| Formula weight                              | 225.21                                                        |
| Temperature/K                               | 296(2)                                                        |
| Crystal system                              | orthorhombic                                                  |
| Space group                                 | P2 <sub>1</sub> 2 <sub>1</sub> 2 <sub>1</sub>                 |
| a/Å                                         | 5.4523(16)                                                    |
| b/Å                                         | 12.972(4)                                                     |
| c/Å                                         | 14.974(5)                                                     |
| α/°                                         | 90                                                            |
| β/°                                         | 90                                                            |
| γ/°                                         | 90                                                            |
| Volume/Å <sup>3</sup>                       | 1059.1(6)                                                     |
| Z                                           | 4                                                             |
| ρ <sub>calc</sub> /cm <sup>3</sup>          | 1.412                                                         |
| μ/mm <sup>-1</sup>                          | 0.099                                                         |
| F(000)                                      | 460.0                                                         |
| Crystal size/mm <sup>3</sup>                | 0.15 × 0.08 × 0.08                                            |
| Radiation                                   | MoKα (λ = 0.71073)                                            |
| 2θ range for data collection/°              | 4.154 to 55.572                                               |
| Index ranges                                | -7 ≤ h ≤ 6, -16 ≤ k ≤ 15, -18 ≤ l ≤ 19                        |
| Reflections collected                       | 6680                                                          |
| Independent reflections                     | 2476 [R <sub>int</sub> = 0.0362, R <sub>sigma</sub> = 0.0450] |
| Data/restraints/parameters                  | 2476/0/155                                                    |
| Goodness-of-fit on F <sup>2</sup>           | 1.011                                                         |
| Final R indexes [I >= 2σ (I)]               | R <sub>1</sub> = 0.0451, wR <sub>2</sub> = 0.0951             |
| Final R indexes [all data]                  | R <sub>1</sub> = 0.0615, wR <sub>2</sub> = 0.1028             |
| Largest diff. peak/hole / e Å <sup>-3</sup> | 0.23/-0.26                                                    |

|                                   |                                                              |
|-----------------------------------|--------------------------------------------------------------|
| compound                          | 2·3H <sub>2</sub> O                                          |
| CCDC number                       | 2246334                                                      |
| Empirical formula                 | C <sub>6</sub> H <sub>9</sub> N <sub>11</sub> O <sub>3</sub> |
| Formula weight                    | 283.24                                                       |
| Temperature                       | 160(2) K                                                     |
| Wavelength                        | 0.71073 Å                                                    |
| Crystal system                    | Orthorhombic                                                 |
| Space group                       | P2 <sub>1</sub> 2 <sub>1</sub> 2 <sub>1</sub>                |
| Unit cell dimensions              | a = 5.6133(12) Å, α = 90°.                                   |
|                                   | b = 13.359(3) Å, β = 90°.                                    |
|                                   | c = 16.245(4) Å, γ = 90°.                                    |
| Volume                            | 1218.1(4) Å <sup>3</sup>                                     |
| Z                                 | 4                                                            |
| Density (calculated)              | 1.544 Mg/m <sup>3</sup>                                      |
| Absorption coefficient            | 0.127 mm <sup>-1</sup>                                       |
| F(000)                            | 584                                                          |
| Crystal size                      | 0.200 x 0.200 x 0.200 mm <sup>3</sup>                        |
| Theta range for data collection   | 2.508 to 26.406°.                                            |
| Index ranges                      | -6 ≤ h ≤ 7, -16 ≤ k ≤ 15, -20 ≤ l ≤ 19                       |
| Reflections collected             | 7107                                                         |
| Independent reflections           | 2474 [R(int) = 0.0738]                                       |
| Completeness to theta = 25.242°   | 99.3 %                                                       |
| Absorption correction             | Semi-empirical from equivalents                              |
| Refinement method                 | Full-matrix least-squares on F <sup>2</sup>                  |
| Data / restraints / parameters    | 2474 / 9 / 199                                               |
| Goodness-of-fit on F <sup>2</sup> | 1.023                                                        |
| Final R indices [I > 2σ(I)]       | R1 = 0.0532, wR2 = 0.0894                                    |
| R indices (all data)              | R1 = 0.0970, wR2 = 0.1072                                    |
| Absolute structure parameter      | 0.3(10)                                                      |
| Extinction coefficient            | n/a                                                          |
| Largest diff. peak and hole       | 0.243 and -0.248 e.Å <sup>-3</sup>                           |

### 3. Calculations of the Heats of Formation.

The heats of formation of **1**, **2** and **3** were computed with the method of isodesmic reactions by using the Gaussian 16 program [2].

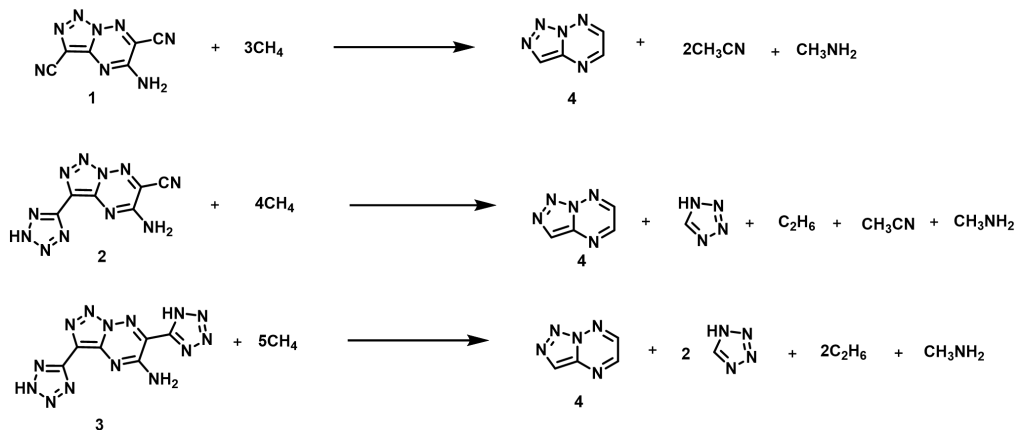

**Table S1** Calculated (M052X/6-31+G\*\*// MP2/6-311++G\*\*) total energy( $E_0$ ), zero-point energy ( $ZPE$ ), values of the correction (Hr), and heats of formation (HOF) of **1**, **2** and **3**.

| compounds                       | $E_0$        | $ZPE$    | Hr       | HOF         |
|---------------------------------|--------------|----------|----------|-------------|
| CH <sub>4</sub>                 | -40.3796220  | 0.044793 | 0.048605 | -74.6       |
| CH <sub>3</sub> CN              | -132.4107856 | 0.045278 | 0.049841 | 74          |
| C <sub>2</sub> H <sub>6</sub>   | -79.5716306  | 0.074599 | 0.079027 | -84.0       |
| CH <sub>3</sub> NH <sub>2</sub> | -95.59384    | 0.06403  | 0.06840  | -23.5       |
| 1H-tetrazole                    | -257.65387   | 0.04686  | 0.05129  | 320.0       |
| <b>1</b>                        | -666.1577495 | 0.096462 | 0.108153 | 755.375515  |
| <b>2</b>                        | -830.6114171 | 0.126064 | 0.139642 | 938.4574189 |
| <b>3</b>                        | -995.0806626 | 0.156527 | 0.171635 | 1084.880608 |
| <b>4</b>                        | -426.8569015 | 0.083005 | 0.089449 | 570.5479602 |

[a] The values of total energy( $E_0$ ), zero-point energy ( $ZPE$ ), values of the correction (Hr) were calculated with the MP2 method by using the Gaussian 16 program, the value of HOF was calculated with the G2 method by using the Gaussian 16 program.

## 4. DFT Calculations of Mechanism for DR Reaction.

The geometry optimization and frequency calculations of all species in this study were performed using M062X-D3/def2-TZVP by Gaussian 16 package. The intrinsic reaction coordinate (IRC) was conducted to confirm the connection between the transition state and the right reactant/product. All single-point calculations with the level of wB97X-2-D3/def2-TZVPP were performed by ORCA 5.0.0. [3] Based on high-precision single-point energy and frequency analysis the Gibbs free energy and thermodynamic corrections to Gibbs free energy of all species in the gas-phase of 298.15 K, 1atm were performed by Shermo 2.3.4 package.[4]

| Species | E(M062X-D3/def2-TZVPP)(a.u.) | TCG(a.u.) | G(a.u.)      | del-G(kcal/mol) |
|---------|------------------------------|-----------|--------------|-----------------|
| int 4   | -666.595488                  | 0.057364  | -666.538124  | 0               |
| TS1     | -666.570882                  | 0.054295  | -666.516587  | 13.51           |
| int 5   | -666.599762                  | 0.053555  | -666.546207  | -5.07           |
| TS2     | -666.582870                  | 0.053953  | -666.528918  | 5.78            |
| int 6   | -666.602164                  | 0.053666  | -666.548498  | -6.51           |
| TS3     | -666.578877                  | 0.054556  | -666.524321  | 8.66            |
| 1       | -666.606398                  | 0.057498  | -666.5489004 | -6.76           |

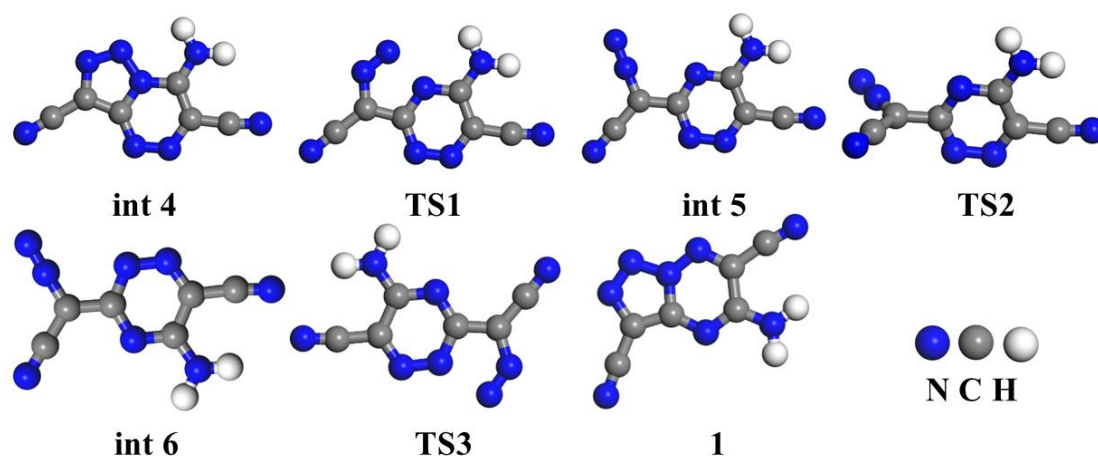

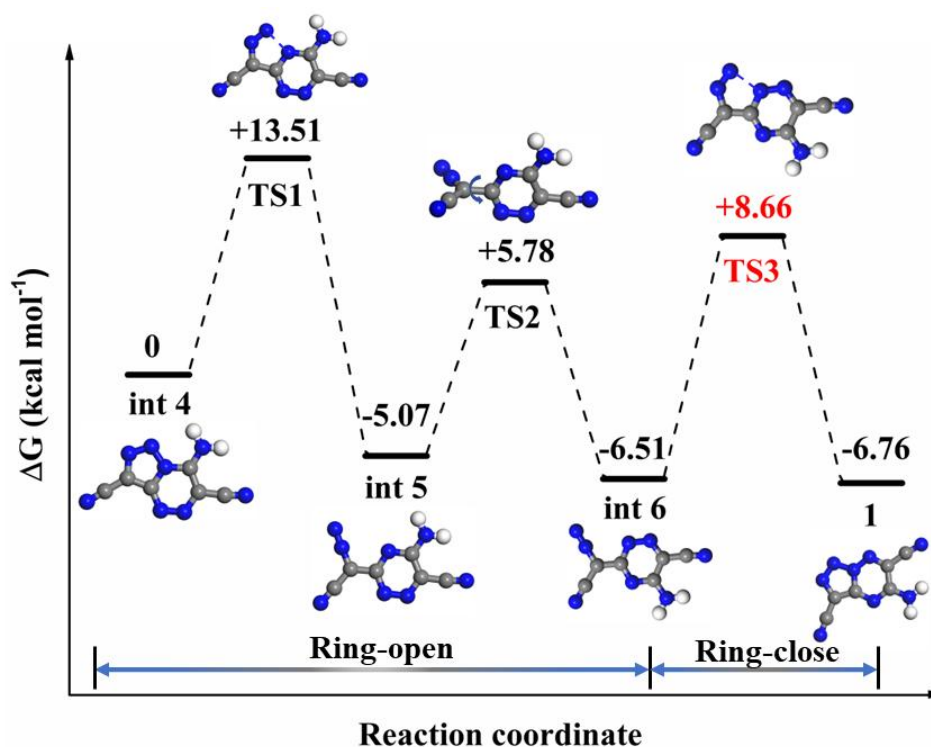

## 5. The Electrostatic Potentials (ESP) Analysis of 1, 2 and 3.

**Table S2** The detail values of electropositive and electronegative areas of 1.

| The number of surface minima: 8 |             |           |            |                            |           |           |
|---------------------------------|-------------|-----------|------------|----------------------------|-----------|-----------|
| number                          | a.u.        | eV        | kcal/mol   | X/Y/Z coordinate(Angstrom) |           |           |
| 1                               | -0.02608729 | -0.709871 | -16.370033 | -6.200722                  | -0.766771 | 0.022017  |
| 2                               | 0.02835275  | 0.771517  | 17.791632  | -1.990558                  | 2.398199  | 1.969828  |
| 3                               | 0.02855208  | 0.776942  | 17.916717  | -1.947224                  | 2.409411  | -1.964891 |
| 4                               | -0.01727751 | -0.470145 | -10.841811 | -1.159026                  | -3.260740 | 0.033956  |
| 5                               | -0.03994699 | -1.087013 | -25.067139 | 1.043038                   | -4.006705 | 0.020256  |
| 6                               | -0.01791453 | -0.487479 | -11.241546 | 1.265945                   | 2.802968  | 0.049556  |
| 7                               | -0.04644782 | -1.263909 | -29.146470 | 3.921664                   | -2.621099 | -0.011180 |
| 8*                              | -0.05575471 | -1.517163 | -34.986635 | 5.644928                   | 2.661317  | -0.017735 |

| The number of surface maxima: 6 |            |          |           |                            |          |           |
|---------------------------------|------------|----------|-----------|----------------------------|----------|-----------|
| number                          | a.u.       | eV       | kcal/mol  | X/Y/Z coordinate(Angstrom) |          |           |
| 1                               | 0.10250319 | 2.789254 | 64.321777 | -4.168623                  | 2.406085 | 0.045359  |
| 2                               | 0.06626631 | 1.803198 | 41.582772 | -2.523385                  | 0.686259 | -1.624892 |
| 3                               | 0.06604795 | 1.797256 | 41.445748 | -2.612347                  | 0.681219 | 1.603320  |



|    |            |          |           |           |           |           |
|----|------------|----------|-----------|-----------|-----------|-----------|
| 4* | 0.10465363 | 2.847770 | 65.671201 | -1.469699 | 4.206911  | 0.007103  |
| 5  | 0.07190994 | 1.956769 | 45.124207 | -0.470394 | -0.072570 | -1.642662 |
| 6  | 0.07208645 | 1.961572 | 45.234968 | -0.488230 | -0.085533 | 1.642546  |

**Table S3** The detail values of electropositive and electronegative areas of **2**.

| The number of surface minima: 11 |             |           |            |                            |           |           |
|----------------------------------|-------------|-----------|------------|----------------------------|-----------|-----------|
| number                           | a.u.        | eV        | kcal/mol   | X/Y/Z coordinate(Angstrom) |           |           |
| 1                                | -0.02398382 | -0.652633 | -15.050089 | -7.079017                  | -0.281843 | 0.005142  |
| 2                                | -0.01606853 | -0.437247 | -10.083166 | -2.704876                  | 3.141705  | 0.014812  |
| 3                                | 0.03599302  | 0.979420  | 22.585982  | -2.431931                  | -2.527477 | -1.975575 |
| 4                                | 0.03465223  | 0.942935  | 21.744620  | -2.440307                  | -2.531846 | 1.979592  |
| 5                                | -0.04142160 | -1.127139 | -25.992469 | -0.572820                  | 4.357305  | 0.020753  |
| 6                                | 0.02418129  | 0.658006  | 15.173999  | 0.112504                   | -1.838338 | 1.642570  |
| 7                                | 0.02425255  | 0.659945  | 15.218718  | 0.115836                   | -1.815912 | -1.652219 |
| 8                                | -0.06064792 | -1.650314 | -38.057178 | 2.836162                   | 3.022500  | 0.001051  |
| 9*                               | -0.07026192 | -1.911924 | -44.090056 | 4.346811                   | 2.405596  | 0.041852  |
| 10                               | -0.04585189 | -1.247693 | -28.772520 | 5.179148                   | -2.990854 | 0.083313  |
| 11                               | -0.06616345 | -1.800399 | -41.518224 | 6.470313                   | -0.253196 | 0.039462  |

| The number of surface maxima: 7 |            |          |           |                            |           |           |
|---------------------------------|------------|----------|-----------|----------------------------|-----------|-----------|
| number                          | a.u.       | eV       | kcal/mol  | X/Y/Z coordinate(Angstrom) |           |           |
| 1                               | 0.10683448 | 2.907114 | 67.039707 | -4.414077                  | -3.055484 | 0.016840  |
| 2                               | 0.07049157 | 1.918173 | 44.234168 | -3.150888                  | -1.001934 | -1.632007 |
| 3                               | 0.06976543 | 1.898414 | 43.778505 | -3.086331                  | -0.937378 | 1.664936  |
| 4*                              | 0.11560531 | 3.145780 | 72.543485 | -1.366505                  | -4.193896 | 0.045991  |
| 5                               | 0.07549187 | 2.054238 | 47.371904 | -1.323261                  | 0.157961  | -1.642989 |
| 6                               | 0.07549581 | 2.054345 | 47.374376 | -1.341751                  | 0.274505  | 1.640999  |
| 7                               | 0.09814239 | 2.670590 | 61.585333 | 1.330428                   | -3.003040 | 0.045909  |

**Table S4** The detail values of electropositive and electronegative areas of **3**.

| The number of surface minima: 11 |             |           |            |                            |           |          |
|----------------------------------|-------------|-----------|------------|----------------------------|-----------|----------|
| number                           | a.u.        | eV        | kcal/mol   | X/Y/Z coordinate(Angstrom) |           |          |
| 1                                | -0.06821077 | -1.856109 | -42.802937 | -7.369816                  | -0.159871 | 0.056004 |
| 2                                | -0.04841078 | -1.317324 | -30.378247 | -6.075708                  | -2.969347 | 0.037928 |

|    |             |           |            |           |           |           |
|----|-------------|-----------|------------|-----------|-----------|-----------|
| 3* | -0.07218068 | -1.964136 | -45.294098 | -5.300280 | 2.434318  | 0.025894  |
| 4  | -0.06262892 | -1.704219 | -39.300272 | -3.711509 | 2.977786  | 0.021867  |
| 5  | 0.01860232  | 0.506195  | 11.673139  | -1.024641 | -1.872517 | -1.648439 |
| 6  | 0.01865975  | 0.507758  | 11.709178  | -0.966357 | -1.805123 | 1.695634  |
| 7  | -0.03820174 | -1.039522 | -23.971973 | -0.481567 | 4.359212  | 0.020155  |
| 8  | 0.02575255  | 0.700762  | 16.159980  | 1.573109  | -2.689680 | -1.960161 |
| 9  | 0.02573730  | 0.700348  | 16.150416  | 1.678351  | -2.596503 | 1.964161  |
| 10 | -0.03503384 | -0.953319 | -21.984087 | 6.859749  | -1.790345 | 0.020058  |
| 11 | -0.02215687 | -0.602919 | -13.903657 | 7.087440  | 1.243473  | -0.004497 |

| The number of surface maxima: 14 |            |          |           |                            |           |           |
|----------------------------------|------------|----------|-----------|----------------------------|-----------|-----------|
| number                           | a.u.       | eV       | kcal/mol  | X/Y/Z coordinate(Angstrom) |           |           |
| 1                                | 0.01254196 | 0.341284 | 7.870206  | -4.061539                  | -0.571899 | -1.774862 |
| 2                                | 0.01257158 | 0.342090 | 7.888789  | -4.113871                  | -0.590646 | 1.758699  |
| 3                                | 0.09323484 | 2.537049 | 58.505795 | -2.264262                  | -2.986097 | 0.021787  |
| 4                                | 0.10534851 | 2.866679 | 66.107246 | 0.205266                   | -4.179012 | -0.007188 |
| 5                                | 0.07181579 | 1.954207 | 45.065125 | 0.544735                   | 0.221085  | -1.653623 |
| 6                                | 0.07178038 | 1.953243 | 45.042906 | 0.548161                   | 0.222777  | 1.654055  |
| 7                                | 0.06322570 | 1.720459 | 39.674761 | 2.073867                   | -0.872470 | -1.736805 |
| 8                                | 0.06321526 | 1.720175 | 39.668206 | 2.103453                   | -0.851795 | 1.737860  |
| 9                                | 0.06042013 | 1.644115 | 37.914235 | 2.741649                   | 0.848832  | 1.710937  |
| 10                               | 0.06037703 | 1.642942 | 37.887189 | 2.770303                   | 0.873346  | -1.705606 |
| 11                               | 0.07822570 | 2.128630 | 49.087411 | 3.013563                   | -3.618778 | 0.030989  |
| 12*                              | 0.11984336 | 3.261104 | 75.202906 | 3.843863                   | 3.136443  | 0.040592  |
| 13                               | 0.05243500 | 1.426829 | 32.903487 | 4.184944                   | 0.050853  | -1.744225 |
| 14                               | 0.05247304 | 1.427864 | 32.927360 | 4.212384                   | 0.070122  | 1.739196  |

## Reference

- [1] D. Izsak, T. M. Klapötke and C. Pflüger, Dalton Trans., 2015, 44, 17054–17063.
- [2] M. J. Frisch, G. W. Trucks, H. B. Schlegel, et al. Gaussian, Inc., Wallingford CT, 2019.
- [3] Neese, F. Software update: The ORCA program system—Version 5.0. WIREs Comput Mol Sci., 2022, 12:e1606. DOI: 10.1002/wcms.1606
- [4] Tian Lu, Qinxue Chen. Shermo: A general code for calculating molecular thermochemistry properties, Comput. Theor. Chem., 2021, 1200, 113249.

## 6. DSC Plot of All Products.

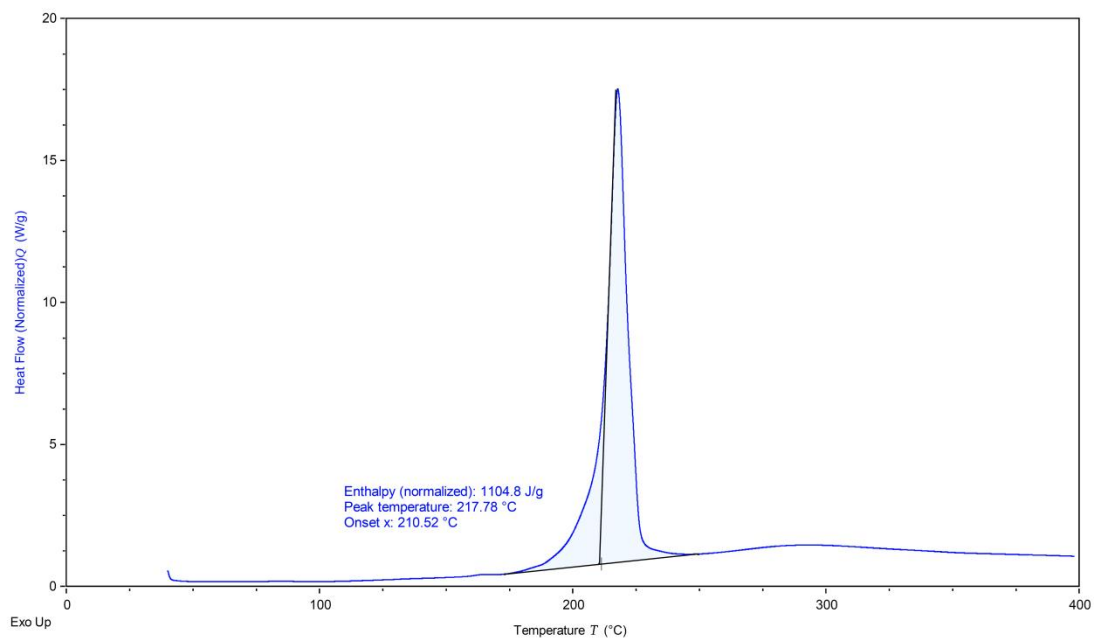

DSC Plot of Compound 1

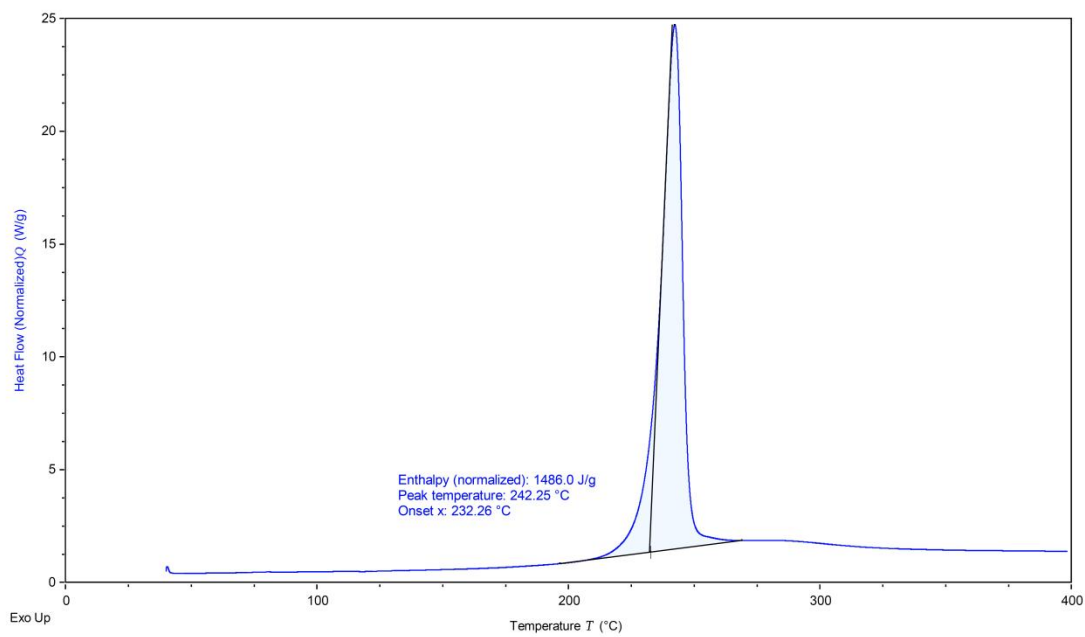

DSC Plot of Compound 2

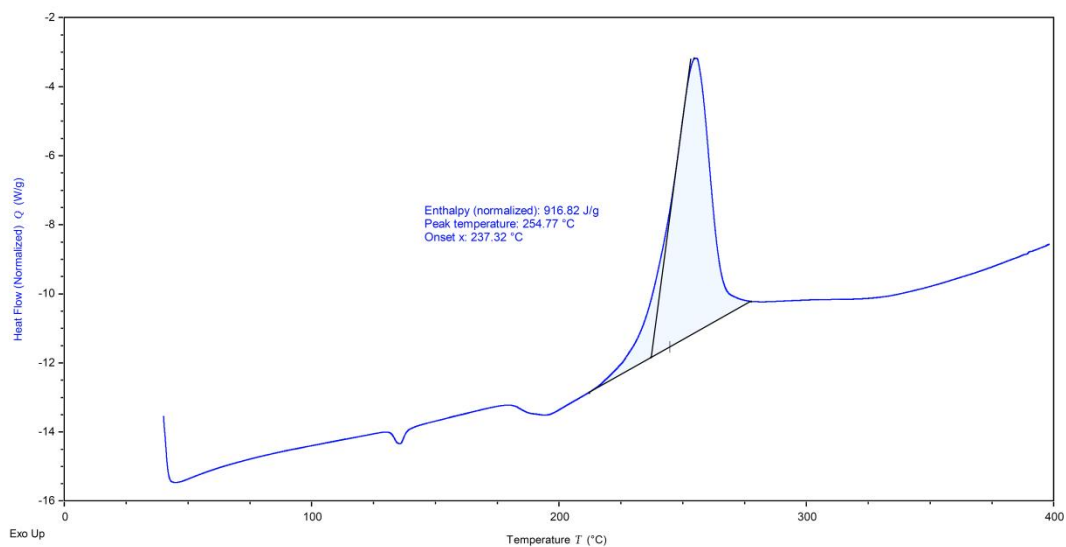

DSC Plot of Compound 3

## 7. NMR Spectra of All Products

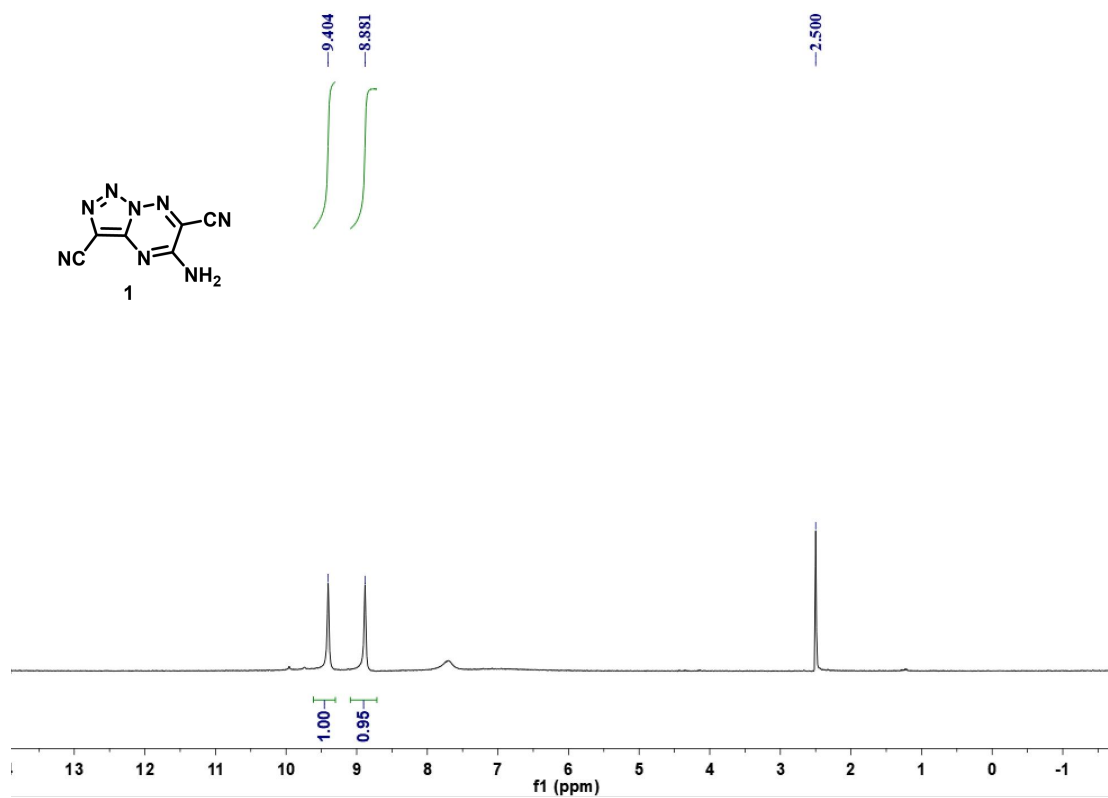

$^1\text{H}$  NMR of compound 1

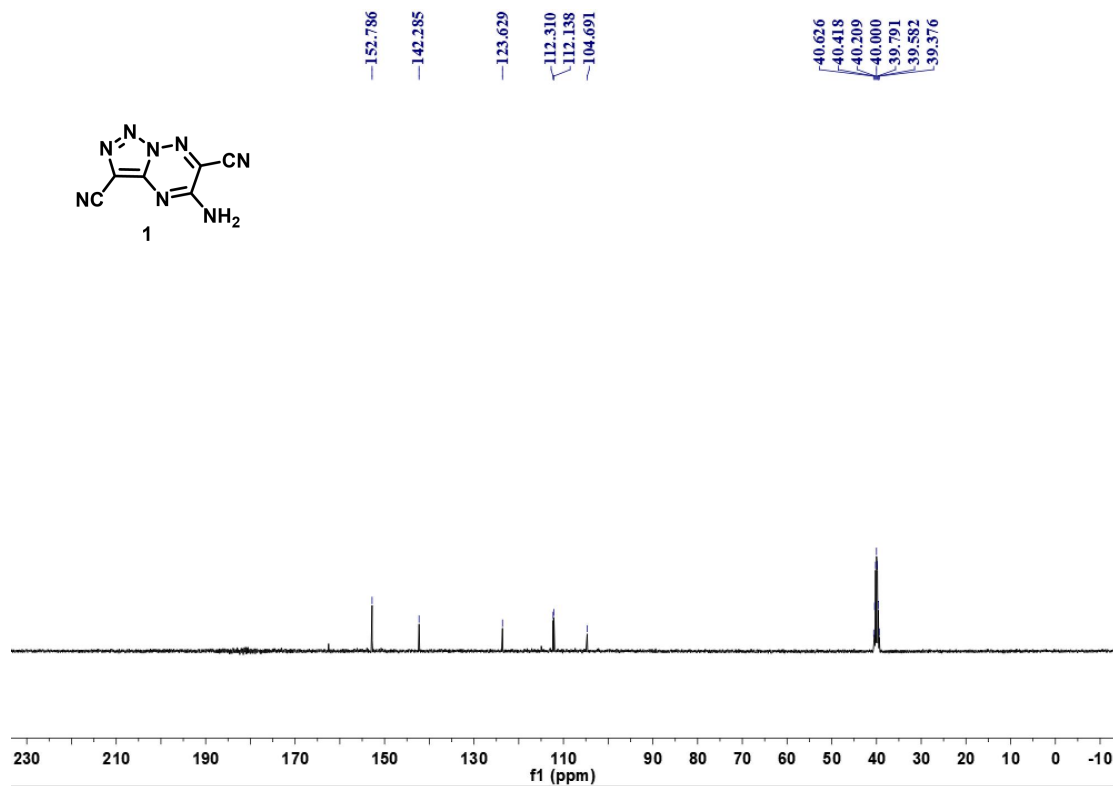

<sup>13</sup>C NMR of compound 1

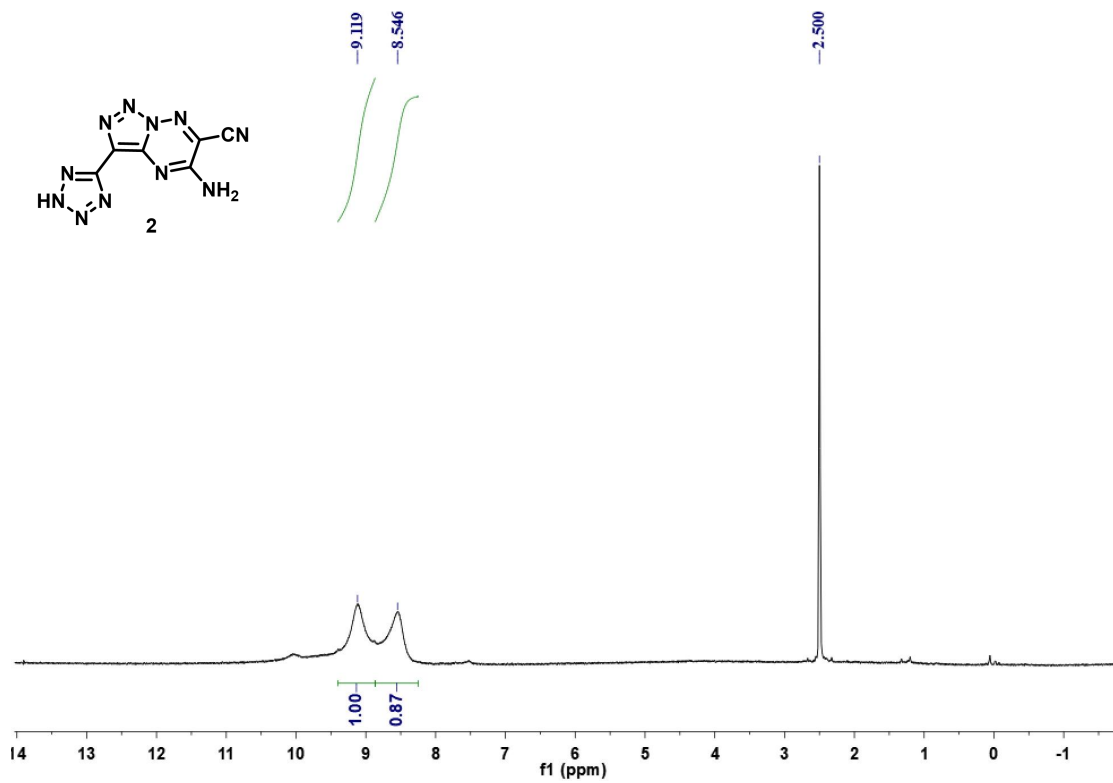

<sup>1</sup>H NMR of compound 2

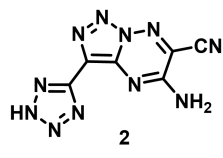

151.868  
148.279  
136.827  
122.787  
117.826  
112.381  
40.301  
40.094  
39.884  
39.676  
39.468

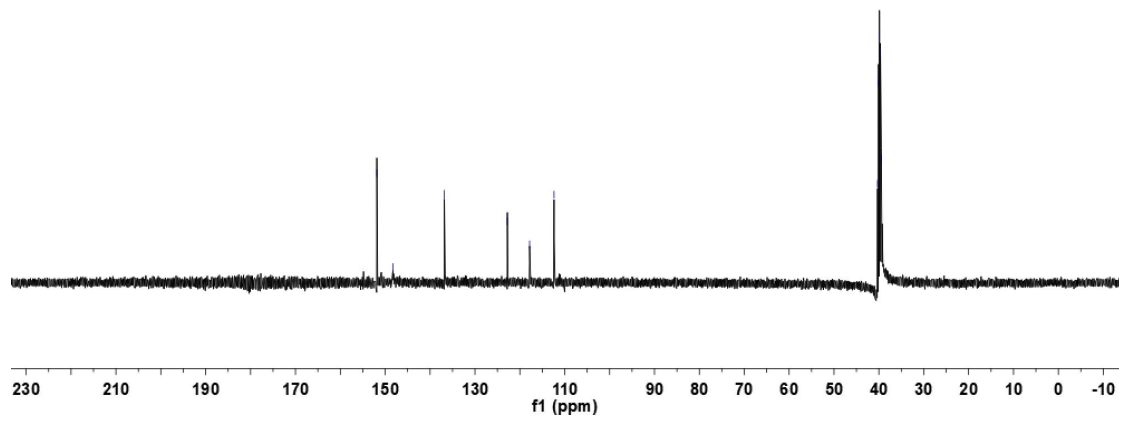

<sup>13</sup>C NMR of compound 2

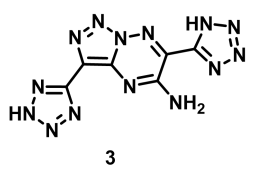

9.249  
8.586  
2.500

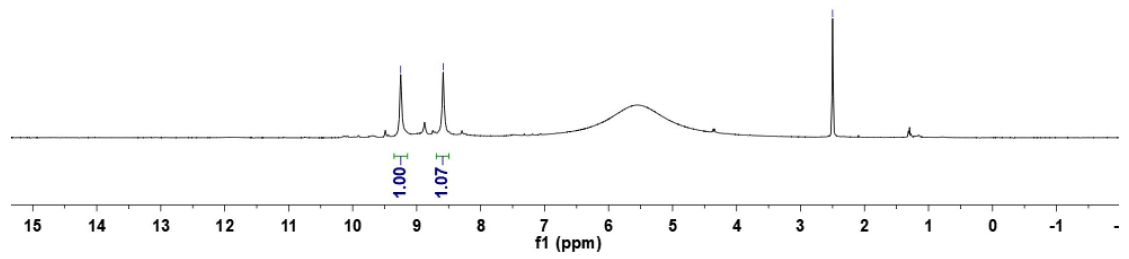

<sup>1</sup>H NMR of compound 3

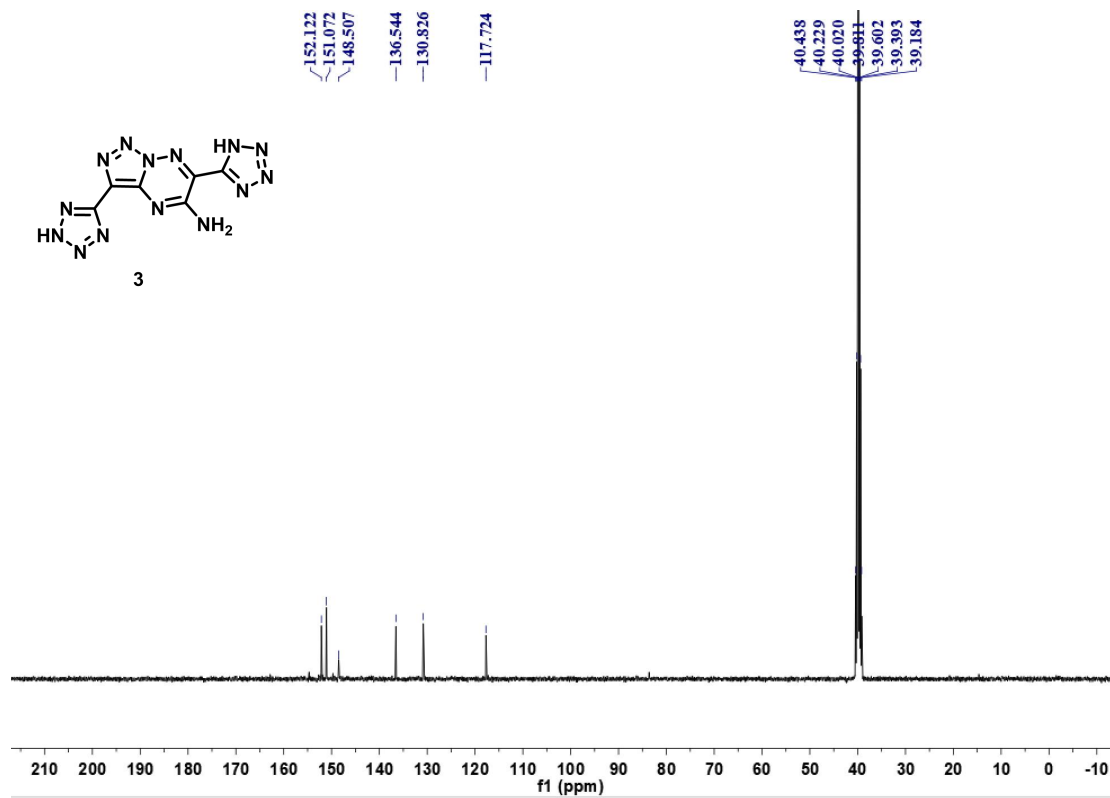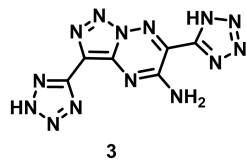

<sup>13</sup>C NMR of compound 3
